# Supplementary material for: Electrical characterization of TiO2/CH3NH3PbI3heterojunction solar cells
Source: Royal Society of Chemistry journal article supplement (doi:10.1039/c4ta01219d), 2014-01-01
Supplement: c4ta01219d1.pdf [file c4ta01219d1.pdf]

Supporting Information

## Electrical characterization of TiO<sub>2</sub>/CH<sub>3</sub>NH<sub>3</sub>PbI<sub>3</sub> heterojunction solar cells

Wenqiang Liu, Yang Zhang\*

*Institute for Physics of Microsystem, Key Laboratory of Photovoltaic Materials and*

*Department of Physics, Henan University, Kaifeng, Henan 475004, China*

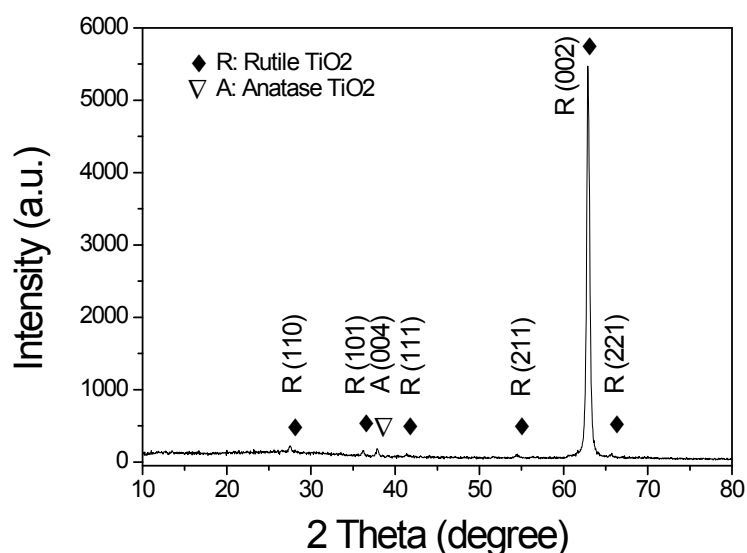

Figure S1. X-ray diffraction pattern of a typical TiO<sub>2</sub> film prepared by solvothermal reaction, sintered at 550 °C.

The crystallinity and growth orientation of TiO<sub>2</sub> films prepared by solvothermal reaction were examined by powder X-ray diffraction (XRD) at room temperature with a Bruker D8-Advance diffractometer, employing Cu K $\alpha$  radiation ( $\lambda = 1.5418 \text{ \AA}$ ) in the range of 10° to 80°. Figure S1 shows a typical XRD pattern of TiO<sub>2</sub> film prepared by solvothermal reaction. It is found that the sample has seven diffraction peaks at  $2\theta$  values of 27.58°, 36.30°, 37.86°, 41.30°, 54.42°, 62.86°, and 65.66°, where the diffraction peaks at 27.58°, 36.30°, 41.30°, 54.42°, 62.86°, and 65.66° can be readily

attributed to the (110), (101), (111), (211), (002), and (211) planes of rutile TiO<sub>2</sub> (JCPDS Card No. 21-1276), respectively, while the peak at 37.86° can be attributed to the (004) plane of anatase TiO<sub>2</sub> (JCPDS Card No. 21-1272). No peaks of impurities were observed. This suggests that rutile TiO<sub>2</sub> and anatase TiO<sub>2</sub> phases coexist in the TiO<sub>2</sub> film deposited on the FTO substrate prepared by solvothermal reaction. By comparison, the as-prepared TiO<sub>2</sub> film is dominated by rutile phase. Furthermore, the XRD pattern for the as-prepared TiO<sub>2</sub> film is different in the relative intensities of the (110) and (002) peaks from rutile TiO<sub>2</sub> (JCPDS Card No. 21-1276). The intensity of the (002) peak is the strongest in all peaks, rather than the (110) peak of rutile TiO<sub>2</sub> (JCPDS Card No. 21-1276). This result indicates that the growth of TiO<sub>2</sub> is highly oriented along the (002) plane on FTO substrate during the solvothermal reaction. Such highly oriented rutile TiO<sub>2</sub> films with strong (002) diffraction peak are similar to the oriented, single-crystalline rutile TiO<sub>2</sub> nanorod films prepared by a hydrothermal method. (Bin Liu and Eray S. Aydil, J. Am. Chem. Soc. 2009, 131, 3985–3990)

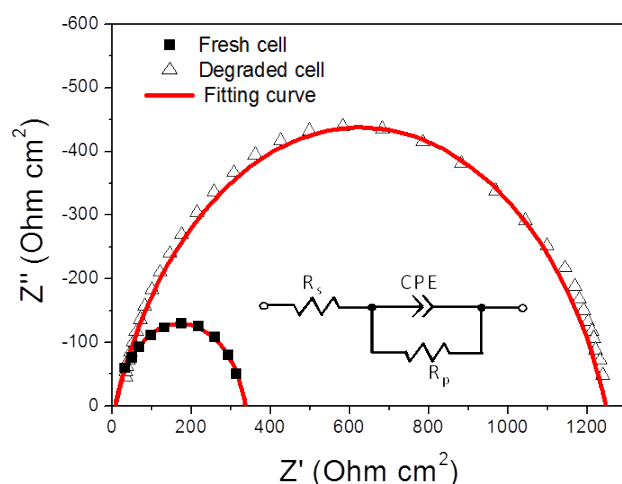

Figure S2. Typical Nyquist plots of a solar cell based on TiO<sub>2</sub>/CH<sub>3</sub>NH<sub>3</sub>PbI<sub>3</sub>. Filled squares, fresh cell; open triangles, cell stored 15 days in air ambient. The curves show theoretical fits using the equivalent circuits shown in the inset.

Figure S2 shows typical Nyquist plots of the freshly prepared cell and its degraded cell stored 15 days in air ambient. From Figure S2, it can be seen that the diameter of semicircle of the degraded cell is much larger than that of the freshly prepared cell. Nyquist plots of fresh and degraded devices were fitted by the equivalent circuit shown as the inset in Figure S2. The fitting curves are shown in Figure S2 as solid curves together with the experimental data denoted as symbols. The parameters determined by the fitting of the experimental data are summarized in Table S1. In this equivalent circuit, series resistance ( $R_s$ ) represents the Ohmic resistance including the electrodes and bulk resistance in the cell. Generally,  $V_{oc}$  would be increased due to the increase of  $R_s$ . On the other hand,  $R_p$  is dominated by the interface charge transport process. Larger  $R_p$  represents less recombination in charge transport process, which can lead to improved collection of charge carriers at open circuit. Thus higher  $V_{oc}$  value can be obtained. However, increasing with the resistance, the photocurrents and fill factor may be reduced.

Table S1. Parameters employed for the fitting of the impedance spectra by use of an equivalent circuit model.

| Device               | $R_s(\Omega \text{ cm}^2)$ | $R_p(\Omega \text{ cm}^2)$ | CPE-T(F/cm <sup>2</sup> ) | CPE-P |
|----------------------|----------------------------|----------------------------|---------------------------|-------|
| Fresh cell           | 7.7                        | 329                        | 4e-7                      | 0.853 |
| Degraded for 15 days | 8.0                        | 1240                       | 5e-7                      | 0.784 |
